# Supplementary material for: Spirooxazine molecular switches with nonlinear optical responses as selective cation sensors
Source: Royal Society of Chemistry journal article supplement (doi:10.1039/c6ra25478k), 2017-01-01
Supplement: c6ra25478k1.pdf [file c6ra25478k1.pdf]

## **Spirooxazine Molecular Switches with Nonlinear Optical Responses as Selective Cation Sensors**

Jin-Ting Ye,<sup>a</sup> Li Wang,<sup>a</sup> Hong-Qiang Wang,<sup>a</sup> Zhen-Zhen Chen,<sup>a</sup> Yong-Qing Qiu<sup>\* ab</sup>,

Hai-Ming Xie<sup>\* ab</sup>

<sup>a</sup>Faculty of Chemistry, Institute of Functional Material Chemistry, Northeast Normal University, Changchun, Jilin 130024, China.

<sup>b</sup>National & Local United Engineering Laboratory for Power Battery, Faculty of Chemistry, Northeast Normal University, Changchun, Jilin 130024, China.

---

\* Corresponding Author. Fax: +86 431 85098768.

E-mail addresses: [qiuyq466@nenu.edu.cn](mailto:qiuyq466@nenu.edu.cn) (Y. Q. Qiu), [xiehm136@nenu.edu.cn](mailto:xiehm136@nenu.edu.cn) (H. M. Xie).

**Table S1.** Selected NBO second-order interaction energies ( $E_2$ , kcal mol<sup>-1</sup>) of the cation compounds at the B3LYP/6-31G(d)/LanL2DZ level.

| Compound            | Donor NBO( <i>i</i> )→Acceptor NBO( <i>j</i> ) | $E_2$ |
|---------------------|------------------------------------------------|-------|
| MC*Li <sup>+</sup>  | LP1 N1→LP*1 Li                                 | 13.63 |
|                     | LP2 O1→LP*1 Li                                 | 25.19 |
| MC*Na <sup>+</sup>  | LP1 N1→LP*1 Na                                 | 7.65  |
|                     | LP1 O1→LP*1 Na                                 | 9.55  |
| MC*K <sup>+</sup>   | LP1 N1→LP*1 K                                  | 0.33  |
|                     | LP1 O1→LP*1 K                                  | 5.27  |
| MC*Mg <sup>2+</sup> | LP1 N1→LP*1 Mg                                 | 37.18 |
|                     | LP2O1→LP*1 Mg                                  | 37.67 |
| MC*Ca <sup>2+</sup> | LP1 N1→LP*1 Ca                                 | 9.83  |
|                     | LP2O1→LP*1 Ca                                  | 11.71 |
| MC*Fe <sup>2+</sup> | LP1 N1→LP*1 Fe                                 | 69.67 |
|                     | LP3 O1→LP*4 Fe                                 | 60.22 |
| MC*Zn <sup>2+</sup> | LP1 N1→LP*6 Zn                                 | 55.45 |
|                     | LP2 O1→LP*6 Zn                                 | 54.51 |
| MC*Ag <sup>+</sup>  | LP1 N1→LP*1 Ag                                 | 16.51 |
|                     | LP2 O1→LP*6 Ag                                 | 24.90 |

LP, 1-center valence lone pair. LP\*, 1-center valence antibond lone pair.

**Table S2.** Individual components of first hyperpolarizabilities and total first hyperpolarizabilities ( $10^{-30}$  esu), computed at various levels of theory.

| Compound            | Functionals    | $\beta_x$ | $\beta_y$ | $\beta_z$ | $\beta_{tot}$ |
|---------------------|----------------|-----------|-----------|-----------|---------------|
| SP                  | CAM-B3LYP      | 0.5       | -3.9      | -1.0      | 4.0           |
|                     | BHandHLYP      | 1.2       | -3.7      | -0.7      | 3.9           |
|                     | M06-2X         | 0.2       | -3.6      | -1.0      | 3.7           |
|                     | $\omega$ B97XD | 0.6       | -3.8      | -1.0      | 4.0           |
| MC*Li <sup>+</sup>  | CAM-B3LYP      | -50.0     | -31.9     | 1.4       | 59.3          |
|                     | BHandHLYP      | -52.0     | -31.8     | 1.3       | 60.9          |
|                     | M06-2X         | -50.6     | -31.2     | 1.5       | 59.4          |
|                     | $\omega$ B97XD | -48.6     | -31.9     | 1.4       | 58.2          |
| MC*Na <sup>+</sup>  | CAM-B3LYP      | -58.2     | -30.9     | 5.5       | 66.1          |
|                     | BHandHLYP      | -59.3     | -30.4     | 5.3       | 66.9          |
|                     | M06-2X         | -59.7     | -30.4     | 5.5       | 67.2          |
|                     | $\omega$ B97XD | -57.0     | -30.6     | 5.4       | 64.9          |
| MC*K <sup>+</sup>   | CAM-B3LYP      | -41.3     | -31.8     | 3.1       | 52.3          |
|                     | BHandHLYP      | -40.9     | -30.8     | 2.9       | 51.3          |
|                     | M06-2X         | -43.5     | -31.6     | 3.1       | 53.9          |
|                     | $\omega$ B97XD | -40.8     | -31.3     | 3.1       | 51.5          |
| MC*Mg <sup>2+</sup> | CAM-B3LYP      | -55.9     | -39.5     | 6.5       | 68.7          |
|                     | BHandHLYP      | -63.0     | -39.9     | 6.4       | 74.8          |
|                     | M06-2X         | -49.6     | -37.1     | 6.5       | 62.3          |
|                     | $\omega$ B97XD | -53.2     | -40.2     | 6.6       | 67.1          |
| MC*Ca <sup>2+</sup> | CAM-B3LYP      | -75.3     | -33.8     | 18.9      | 84.6          |
|                     | BHandHLYP      | -82.4     | -34.7     | 17.9      | 91.2          |
|                     | M06-2X         | -68.5     | -31.2     | 18.9      | 77.6          |
|                     | $\omega$ B97XD | -73.4     | -34.2     | 18.1      | 83.0          |
| MC*Fe <sup>2+</sup> | CAM-B3LYP      | -20.0     | -32.8     | 0.3       | 38.4          |
|                     | BHandHLYP      | -31.0     | -33.7     | 0.8       | 45.8          |
|                     | M06-2X         | -14.3     | -28.0     | 0.9       | 31.5          |
|                     | $\omega$ B97XD | -15.5     | -33.5     | 0.4       | 36.9          |
| MC*Zn <sup>2+</sup> | CAM-B3LYP      | -50.6     | -41.6     | 6.1       | 65.8          |
|                     | BHandHLYP      | -58.1     | -42.6     | 5.8       | 72.3          |
|                     | M06-2X         | -42.5     | -38.3     | 6.2       | 57.5          |
|                     | $\omega$ B97XD | -47.6     | -42.4     | 6.2       | 64.0          |
| MC*Ag <sup>+</sup>  | CAM-B3LYP      | -53.4     | -34.0     | 4.6       | 63.5          |
|                     | BHandHLYP      | -55.8     | -33.4     | 4.4       | 65.2          |
|                     | M06-2X         | -54.8     | -33.3     | 4.6       | 64.2          |
|                     | $\omega$ B97XD | -52.2     | -34.1     | 4.5       | 62.5          |

**Table S3.** The first hyperpolarizabilities ( $10^{-30}$  esu) of MC\*Ca<sup>2+</sup> calculated at the CAM-B3LYP level using various basis sets.

| Basis set     | $\beta_x$ | $\beta_y$ | $\beta_z$ | $\beta_{\text{tot}}$ |
|---------------|-----------|-----------|-----------|----------------------|
| 6-31+G(d)     | -75.3     | -33.8     | 18.9      | 84.6                 |
| 6-31++G(d)    | -75.1     | -33.8     | -19.0     | 84.5                 |
| 6-31+G(d,p)   | -75.0     | -33.9     | 18.9      | 84.4                 |
| 6-31++G(d,p)  | -74.8     | -33.8     | 18.9      | 84.2                 |
| 6-311++G(d,p) | -76.8     | -34.0     | 19.7      | 86.3                 |

**Table S4.** The first hyperpolarizabilities ( $10^{-30}$  esu) of the compounds (SP, MC\*K<sup>+</sup>, MC\*Ca<sup>2+</sup>, MC\*Fe<sup>2+</sup>, and MC\*Zn<sup>2+</sup>) computed in gas phase and methanol solvent at various levels of theory.

| Compounds           | Functionals    | $\beta_{\text{tot}}$ |                  |
|---------------------|----------------|----------------------|------------------|
|                     |                | Gas phase            | Methanol solvent |
| SP                  | CAM-B3LYP      | 4.0                  | 10.4             |
|                     | BHandHLYP      | 3.9                  | 9.6              |
|                     | M06-2X         | 3.7                  | 9.8              |
|                     | $\omega$ B97XD | 4.0                  | 10.3             |
| MC*K <sup>+</sup>   | CAM-B3LYP      | 52.3                 | 194.8            |
|                     | BHandHLYP      | 51.3                 | 185.6            |
|                     | M06-2X         | 53.9                 | 201.7            |
|                     | $\omega$ B97XD | 51.5                 | 195.5            |
| MC*Ca <sup>2+</sup> | CAM-B3LYP      | 84.6                 | 221.7            |
|                     | BHandHLYP      | 91.2                 | 231.0            |
|                     | M06-2X         | 77.6                 | 204.6            |
|                     | $\omega$ B97XD | 83.0                 | 224.0            |
| MC*Fe <sup>2+</sup> | CAM-B3LYP      | 38.4                 | 91.4             |
|                     | BHandHLYP      | 45.8                 | 82.2             |
|                     | M06-2X         | 31.5                 | 92.3             |
|                     | $\omega$ B97XD | 36.9                 | 96.3             |
| MC*Zn <sup>2+</sup> | CAM-B3LYP      | 65.8                 | 165.3            |
|                     | BHandHLYP      | 72.3                 | 182.1            |
|                     | M06-2X         | 57.5                 | 141.1            |
|                     | $\omega$ B97XD | 64.0                 | 162.4            |
